# Supplementary material
Source: PubMed Central journal article supplement (PMC5902671)

## SUPPLEMENTAL FIGURES

**Supplemental Figure 1: Boxplots of FEV-1 distributions among girls (left boxplots) and boys (right boxplots) for children with non-smoking parents (top boxplots) and children with smoking parents (bottom boxplots)**

**FEV-1 among girls with non-smoking parents**

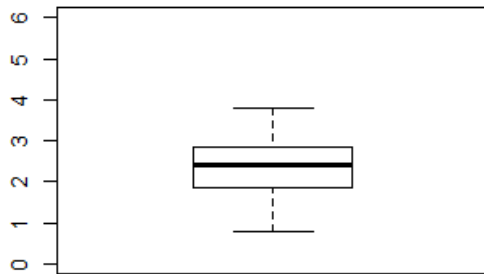

**FEV-1 among girls with smoking parents**

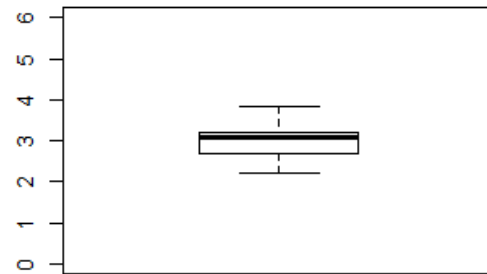

**FEV-1 among boys with non-smoking parents**

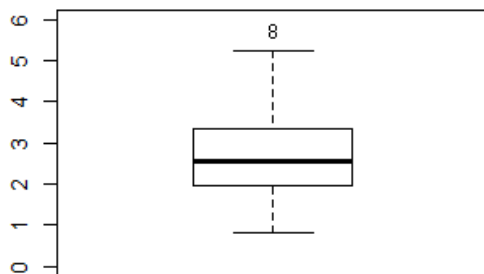

**FEV-1 among boys with smoking parents**

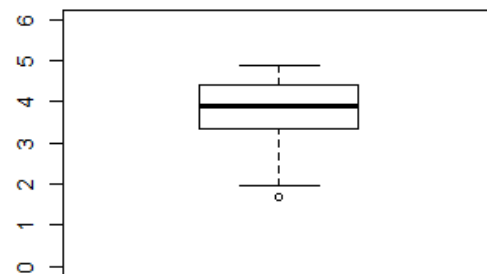

**Supplemental Figure 2: Estimated cubic splines for the FEV-1 vs. age and FEV-1 vs. height relationships**

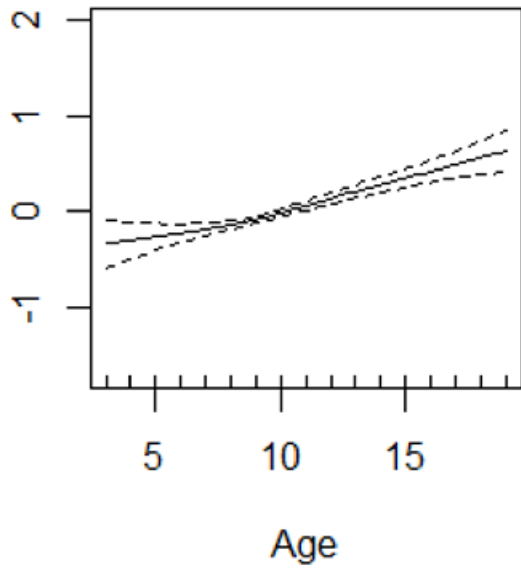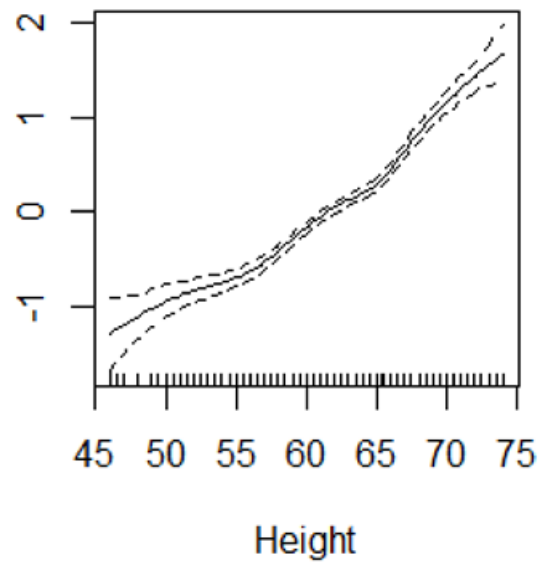

Supplement: NIHMS949380-supplement-Supplemental_file.pdf [file NIHMS949380-supplement-Supplemental_file.pdf]
